# Supplementary material for: Bacillus subtilis PcrA Helicase Removes Trafficking Barriers
Source: MDPI journal article supplement (doi:10.3390/cells10040935), 2021-04-17
Supplement: s1 [file s1]

## *Bacillus subtilis* PcrA helicase removes trafficking barriers

María Moreno-del Álamo<sup>†</sup>, Begoña Carrasco<sup>†</sup>, Rubén Torres, and Juan Carlos Alonso<sup>\*</sup>

Department of Microbial Biotechnology, Centro Nacional de Biotecnología, CNB-CSIC, 28049 Madrid, Spain

<sup>†</sup>These authors contributed equally to this work

**Table S1.** ssDNA-dependence of PcrA ATP hydrolysis

| Proteins         | K <sub>cat</sub> (min <sup>-1</sup> ) |                          |                  |          |                     |          |
|------------------|---------------------------------------|--------------------------|------------------|----------|---------------------|----------|
|                  | ATP (5 mM)                            |                          |                  |          | dATP (5 mM)         |          |
|                  | cssDNA <sup>b</sup>                   | poly(dT)<br><sup>b</sup> | RNA <sup>b</sup> | none     | cssDNA <sup>b</sup> | none     |
| PcrA (15 nM)     | 1790 ± 379                            | 915 ± 106                | 33 ± 3           | 31 ± 5.2 | 639 ± 131           | 30 ± 5.0 |
| PcrAK37A (15 nM) | 26.5 ± 5.0                            | -                        | -                | 35 ± 4.8 | -                   | -        |

<sup>a</sup>The rate of PcrA-mediated ATP hydrolysis was measured as described (see Materials and methods) and were derived from more than three independent experiments like those shown in Figure 4 and S4. <sup>b</sup>The substrates (circular ssDNA [cssDNA], poly(dT) DNA [poly(dT)], or RNA) are 3,199-nt, 20-nt and 38-nt long. The results are shown as mean ± SEM. The - symbol indicates not done.

| DNA               | Substrate description    | Structure +<br>oligonucleotide composition |
|-------------------|--------------------------|--------------------------------------------|
| ssDNA             | 100-nt / 38nt ssDNA      | Fork1/SM44D $\xrightarrow{100/38}$         |
| ssRNA             | 38nt ssRNA               | SM44R $\xrightarrow{38}$                   |
| 3'-tailed         | 3'-tailed DNA            |                                            |
| 5'-tailed         | 5'-tailed DNA            |                                            |
| flayed            | forked DNA               |                                            |
| 3'-fork           | 3'-forked DNA            |                                            |
| Y-fork            | Replicated-fork DNA      |                                            |
| HJ4               | mobile Holliday junction |                                            |
| dsDNA             | 38-bp dsDNA              | SM44D $\xleftrightarrow{38}$ SM45D         |
| 3'-short-tailed   | 3'-tailed DNA            | SM44D $\xleftrightarrow[8]{30}$ SM46D      |
| 5'-short-tailed   | 5'-tailed DNA            | SM44D $\xleftrightarrow[8]{30}$ SM47D      |
| RNA-DNA hybrid    | 38-bp dsRNA-DNA          | SM44R $\xleftrightarrow[38]{38}$ SM45D     |
| 3'-RNA-DNA hybrid | 3'-tailed RNA-DNA        | SM44R $\xleftrightarrow[8]{30}$ SM46D      |
| 5'-RNA-DNA hybrid | 5'-tailed RNA-DNA        | SM44R $\xleftrightarrow[8]{30}$ SM47D      |

Fig. S1. Scheme and composition of the DNA substrates used in this study. In dotted lines is denoted the RNA, and with straight lines the DNA. The non-complementary strands are denoted in grey and the complementary ones in black

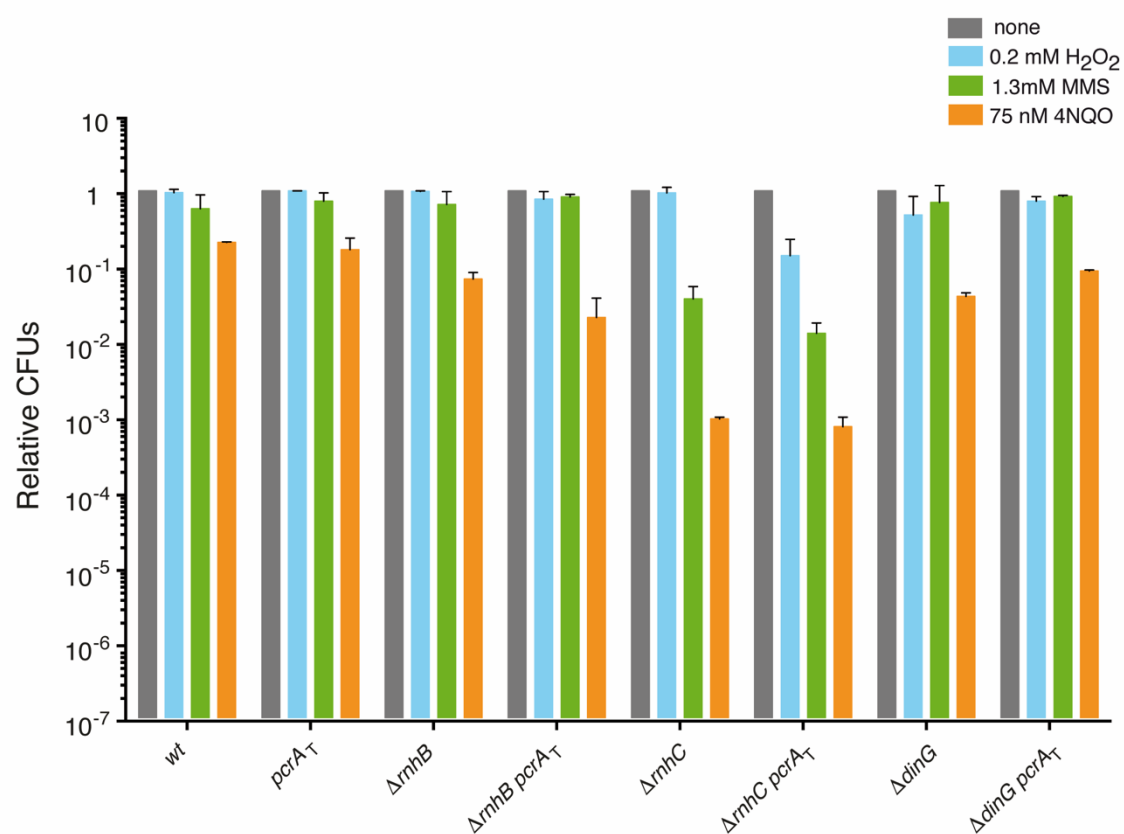

Fig. S2. Survival of *wt* and single and double mutants to cytotoxic agents. Log phase cultures of *wt*, single (*pcrA* $\Delta$ , *rnhB*, *rnhC* or *dinG*) and double mutant (*pcrA* $\Delta$  *rnhB*, *pcrA* $\Delta$  *rnhC* or *pcrA* $\Delta$  *dinG*) strains were diluted, plated on LB agar containing H<sub>2</sub>O<sub>2</sub>, MMS or 4NQO or lacking the clastogens (dark grey bars), and incubated overnight at 37 °C. Experiments were performed at least four times. Data are shown as mean fractional survival  $\pm$  SEM.

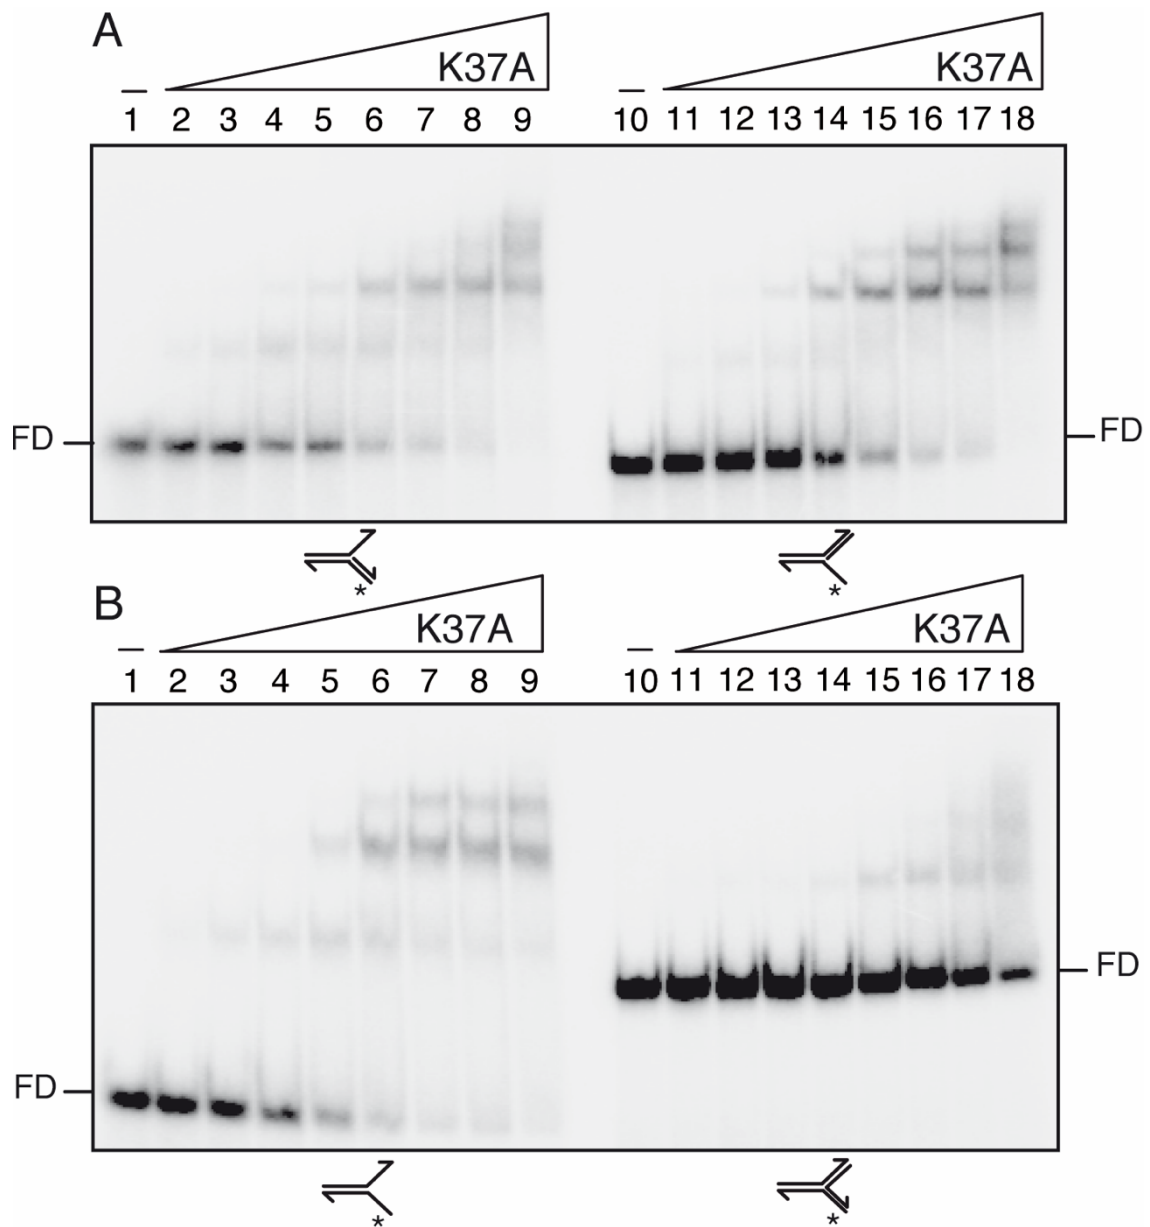

Fig. S3. PcrA K37A binds ssDNA, but poorly does to RNA. Increasing concentrations of PcrA K37A (0.1 to 25 nM) were incubated with  $[\gamma^{32}\text{P}]$ -5' or  $[\gamma^{32}\text{P}]$ -3'-fork DNA (A) or  $[\gamma^{32}\text{P}]$ -flayed DNA and  $[\gamma^{32}\text{P}]$ -Y-fork DNA (B) in buffer D containing 2.5 mM ATP $\gamma$ S substrate and products were separated by 5% PAGE in 0.25X TBE buffer.  $K_{\text{Dapp}}$  values were obtained from EMSA assays after electrophoresis.

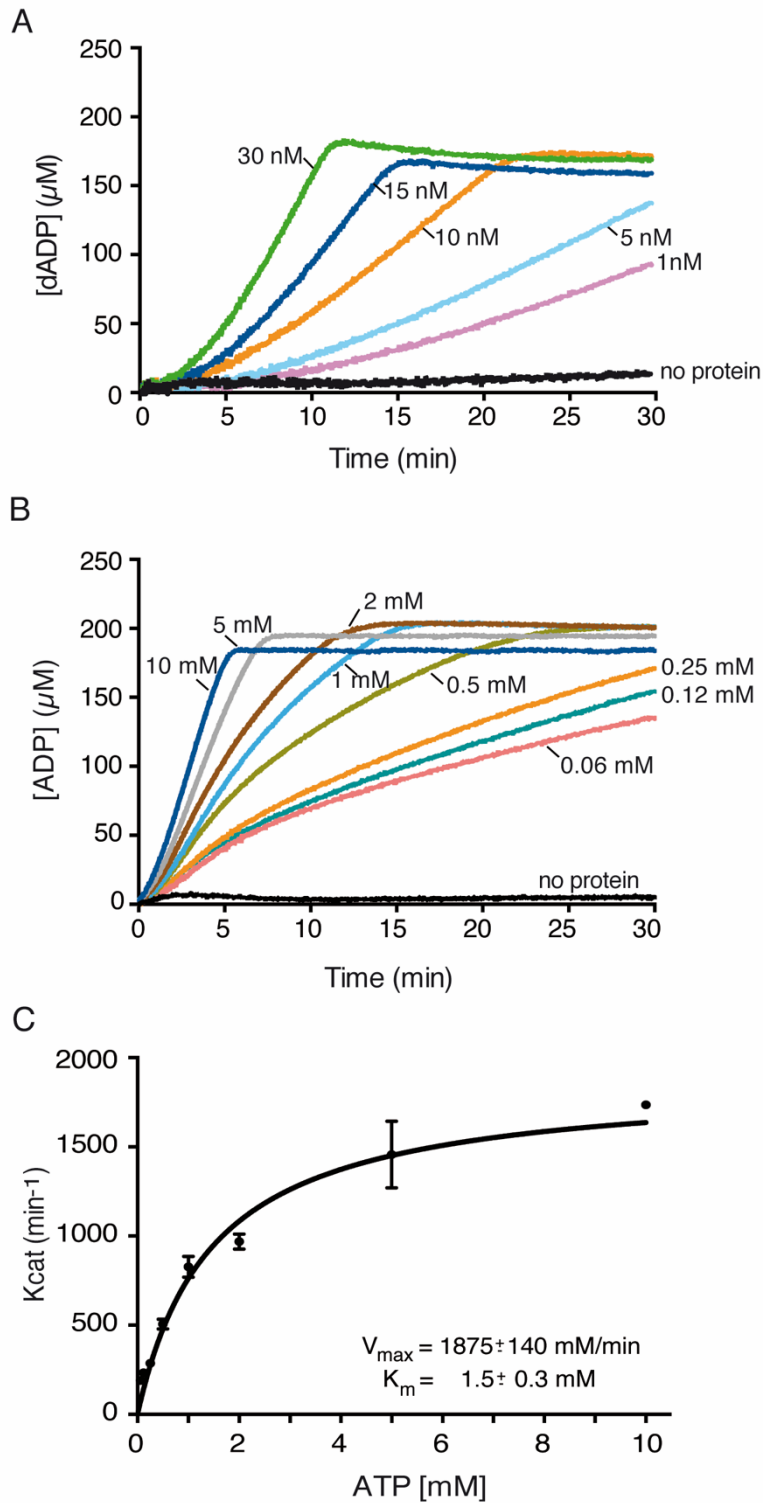

Fig. S4. PcrA hydrolyzes dATP with lower efficiency than ATP. (A) PcrA (1 - 30 nM) was incubated with or without cssDNA at 10  $\mu\text{M}$  (in nts) in buffer E containing 5 mM dATP and the dATPase activity was measured (30 min, 37  $^{\circ}\text{C}$ ). The black line denotes the control reaction corresponding to an dATPase assay in the absence of PcrA. (B) PcrA (15 nM) was incubated with cssDNA at 10  $\mu\text{M}$  (in nts) in buffer A containing increasing ATP concentrations and the ATPase activity was measured (30 min, 37  $^{\circ}\text{C}$ ). (A-B) Representative graphs are shown here. (C) Steady-state ATPase activity of PcrA. The measurements were carried out at 37  $^{\circ}\text{C}$  in buffer A containing increasing ATP concentrations. The line is the one that best fits to the Michaelis-Menten equation to give a  $K_m$  of 1.5  $\mu\text{M}$  and a  $V_{\text{max}}$  of 1875  $\text{mM min}^{-1}$ .

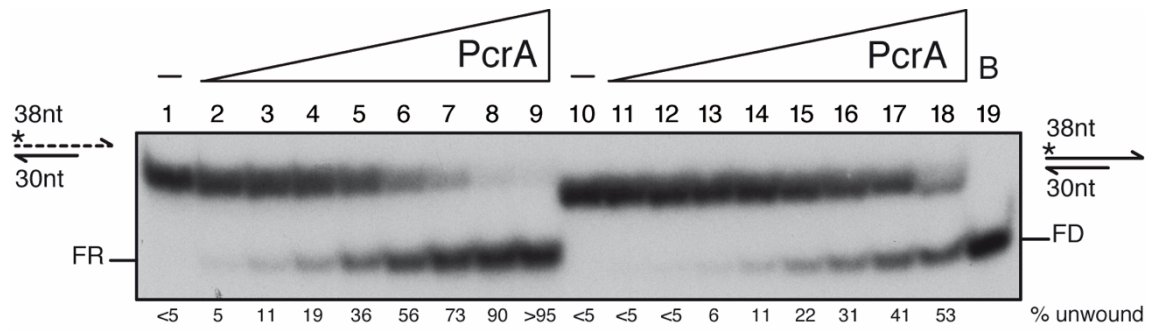

Fig. S5. PcrA preferentially unwinds 3'-tailed RNA-DNA hybrids. Helicase assays with short [ $\gamma^{32}\text{P}$ ]-3'-tailed RNA-DNA hybrids (lines 2-9) or [ $\gamma^{32}\text{P}$ ]-3'-tailed duplex (lines 11-18) in the presence of increasing PcrA concentrations (0.7 to 100 nM) (15 min, 37 °C) in buffer D containing 2.5 mM ATP. After deproteinization, the substrate and products were separated by 6% PAGE and visualized by phosphor imaging. Abbreviations: - and +, the absence or presence of PcrA protein; \*, indicates the [ $\gamma^{32}\text{P}$ ]-labeled strand; half arrow denotes the 3'-end; B, sample boiled prior loading.

## *Bacillus subtilis* PcrA helicase removes trafficking barriers

María Moreno-del Álamo<sup>†</sup>, Begoña Carrasco<sup>†</sup>, Rubén Torres, and Juan Carlos Alonso\*

Department of Microbial Biotechnology, Centro Nacional de Biotecnología, CNB-CSIC, 28049 Madrid, Spain

<sup>†</sup>These authors contributed equally to this work

**Table S1.** ssDNA-dependence of PcrA ATP hydrolysis

| Proteins         | K <sub>cat</sub> (min <sup>-1</sup> ) |                          |                  |          |                     |          |
|------------------|---------------------------------------|--------------------------|------------------|----------|---------------------|----------|
|                  | ATP (5 mM)                            |                          |                  |          | dATP (5 mM)         |          |
|                  | cssDNA <sup>b</sup>                   | poly(dT)<br><sup>b</sup> | RNA <sup>b</sup> | none     | cssDNA <sup>b</sup> | none     |
| PcrA (15 nM)     | 1790 ± 379                            | 915 ± 106                | 33 ± 3           | 31 ± 5.2 | 639 ± 131           | 30 ± 5.0 |
| PcrAK37A (15 nM) | 26.5 ± 5.0                            | -                        | -                | 35 ± 4.8 | -                   | -        |

<sup>a</sup>The rate of PcrA-mediated ATP hydrolysis was measured as described (see Materials and methods) and were derived from more than three independent experiments like those shown in Figure 4 and S4. <sup>b</sup>The substrates (circular ssDNA [cssDNA], poly(dT) DNA [poly(dT)], or RNA) are 3,199-nt, 20-nt and 38-nt long. The results are shown as mean ± SEM. The - symbol indicates not done.

| DNA               | Substrate description    | Structure +<br>oligonucleotide composition |
|-------------------|--------------------------|--------------------------------------------|
| ssDNA             | 100-nt / 38nt ssDNA      | Fork1/SM44D $\xrightarrow{100/38}$         |
| ssRNA             | 38nt ssRNA               | SM44R $\xrightarrow{38}$                   |
| 3'-tailed         | 3'-tailed DNA            |                                            |
| 5'-tailed         | 5'-tailed DNA            |                                            |
| flayed            | forked DNA               |                                            |
| 3'-fork           | 3'-forked DNA            |                                            |
| Y-fork            | Replicated-fork DNA      |                                            |
| HJ4               | mobile Holliday junction |                                            |
| dsDNA             | 38-bp dsDNA              | SM44D $\xleftrightarrow{38}$ SM45D         |
| 3'-short-tailed   | 3'-tailed DNA            | SM44D $\xleftrightarrow[8]{30}$ SM46D      |
| 5'-short-tailed   | 5'-tailed DNA            | SM44D $\xleftrightarrow[8]{30}$ SM47D      |
| RNA-DNA hybrid    | 38-bp dsRNA-DNA          | SM44R $\xleftrightarrow[38]{38}$ SM45D     |
| 3'-RNA-DNA hybrid | 3'-tailed RNA-DNA        | SM44R $\xleftrightarrow[8]{30}$ SM46D      |
| 5'-RNA-DNA hybrid | 5'-tailed RNA-DNA        | SM44R $\xleftrightarrow[8]{30}$ SM47D      |

Fig. S1. Scheme and composition of the DNA substrates used in this study. In dotted lines is denoted the RNA, and with straight lines the DNA. The non-complementary strands are denoted in grey and the complementary ones in black



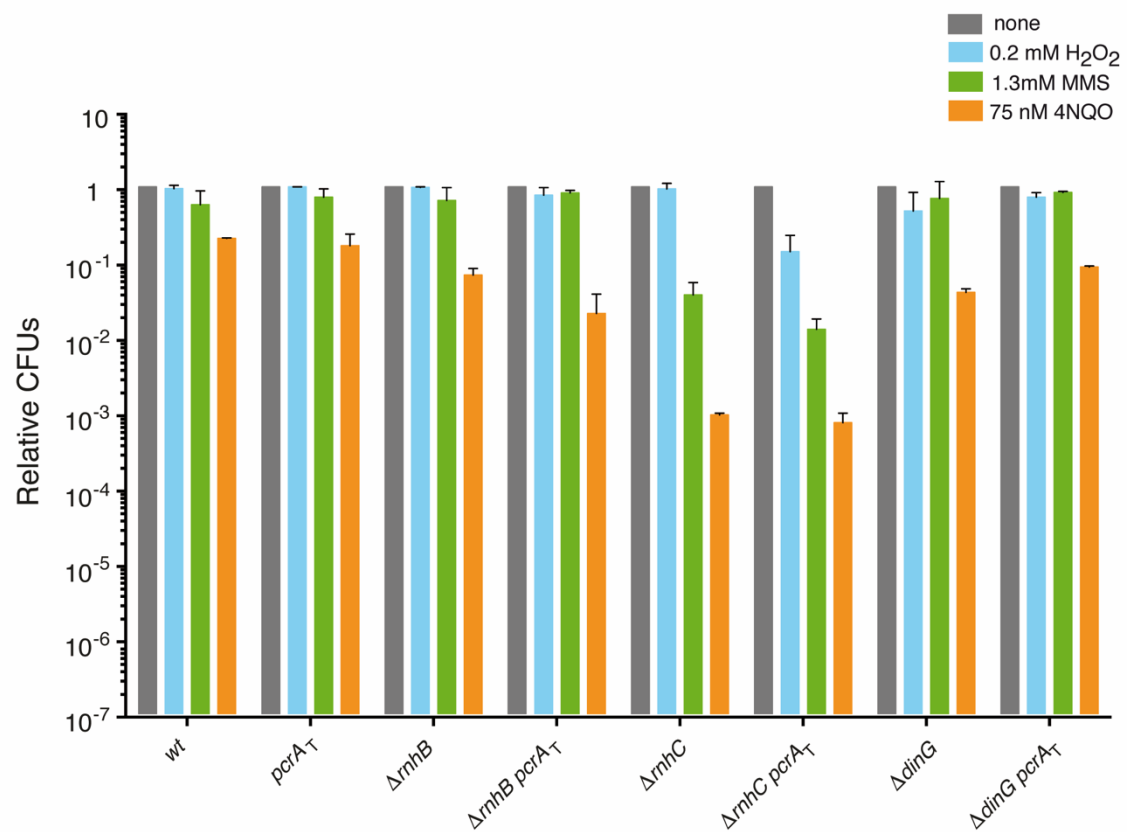

Fig. S2. Survival of *wt* and single and double mutants to cytotoxic agents. Log phase cultures of *wt*, single (*pcrA* $\Delta$ , *rnhB*, *rnhC* or *dinG*) and double mutant (*pcrA* $\Delta$  *rnhB*, *pcrA* $\Delta$  *rnhC* or *pcrA* $\Delta$  *dinG*) strains were diluted, plated on LB agar containing H<sub>2</sub>O<sub>2</sub>, MMS or 4NQO or lacking the clastogens (dark grey bars), and incubated overnight at 37 °C. Experiments were performed at least four times. Data are shown as mean fractional survival  $\pm$  SEM.



Fig. S3. PcrA K37A binds ssDNA, but poorly does to RNA. Increasing concentrations of PcrA K37A (0.1 to 25 nM) were incubated with  $[\gamma^{32}\text{P}]$ -5' or  $[\gamma^{32}\text{P}]$ -3'-fork DNA (A) or  $[\gamma^{32}\text{P}]$ -flayed DNA and  $[\gamma^{32}\text{P}]$ -Y-fork DNA (B) in buffer D containing 2.5 mM ATP $\gamma$ S substrate and products were separated by 5% PAGE in 0.25X TBE buffer.  $K_{\text{Dapp}}$  values were obtained from EMSA assays after electrophoresis.

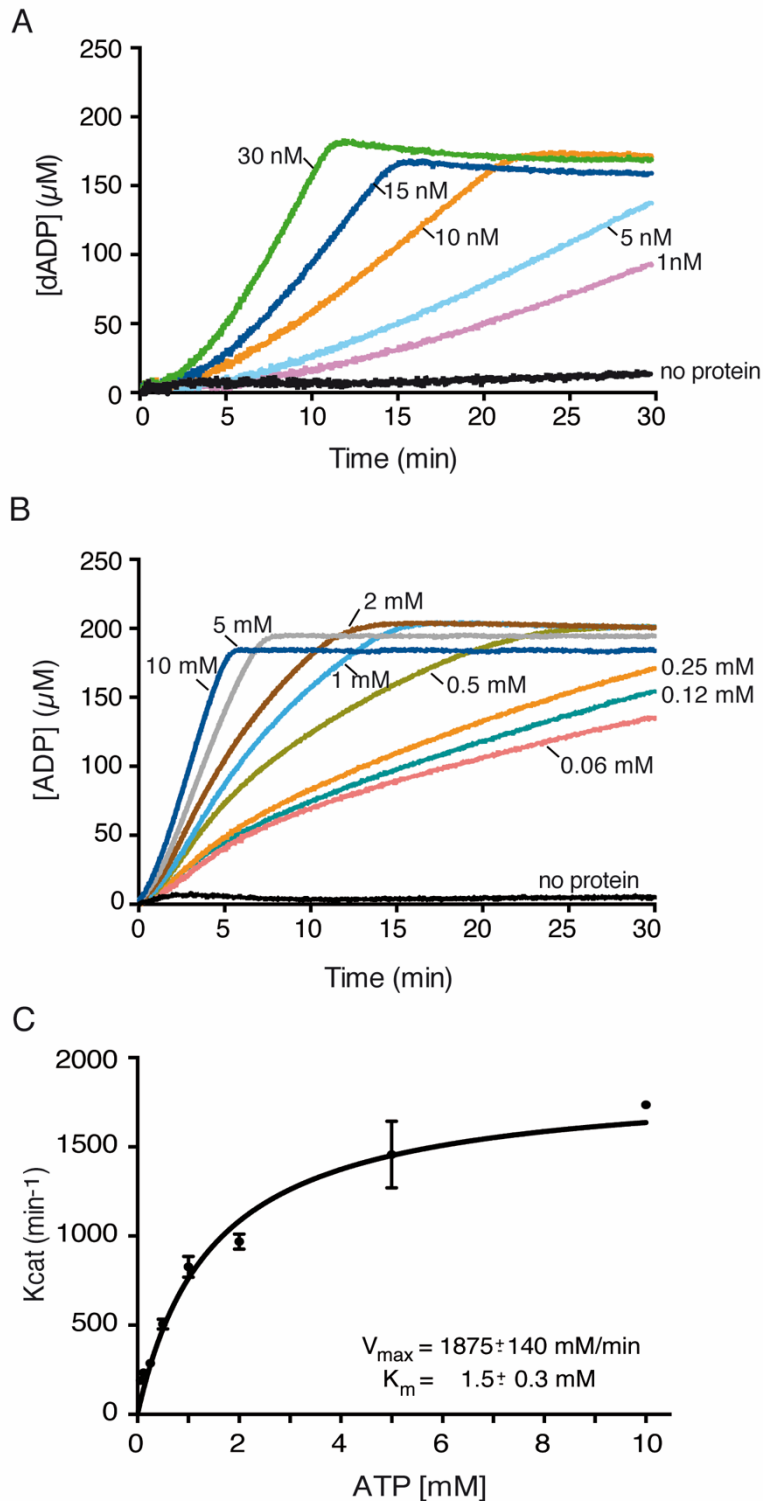

Fig. S4. PcrA hydrolyzes dATP with lower efficiency than ATP. (A) PcrA (1 - 30 nM) was incubated with or without cssDNA at 10  $\mu\text{M}$  (in nts) in buffer E containing 5 mM dATP and the dATPase activity was measured (30 min, 37  $^{\circ}\text{C}$ ). The black line denotes the control reaction corresponding to an dATPase assay in the absence of PcrA. (B) PcrA (15 nM) was incubated with cssDNA at 10  $\mu\text{M}$  (in nts) in buffer A containing increasing ATP concentrations and the ATPase activity was measured (30 min, 37  $^{\circ}\text{C}$ ). (A-B) Representative graphs are shown here. (C) Steady-state ATPase activity of PcrA. The measurements were carried out at 37  $^{\circ}\text{C}$  in buffer A containing increasing ATP concentrations. The line is the one that best fits to the Michaelis-Menten equation to give a  $K_m$  of 1.5  $\mu\text{M}$  and a  $V_{\text{max}}$  of 1875  $\text{mM min}^{-1}$ .



Fig. S5. PcrA preferentially unwinds 3'-tailed RNA-DNA hybrids. Helicase assays with short [ $\gamma^{32}\text{P}$ ]-3'-tailed RNA-DNA hybrids (lines 2-9) or [ $\gamma^{32}\text{P}$ ]-3'-tailed duplex (lines 11-18) in the presence of increasing PcrA concentrations (0.7 to 100 nM) (15 min, 37 °C) in buffer D containing 2.5 mM ATP. After deproteinization, the substrate and products were separated by 6% PAGE and visualized by phosphor imaging. Abbreviations: - and +, the absence or presence of PcrA protein; \*, indicates the [ $\gamma^{32}\text{P}$ ]-labeled strand; half arrow denotes the 3'-end; B, sample boiled prior loading.
